25 **Key words**

26 COVID/SARS-CoV-2/Prophylaxis/Nasal Spray/Formulation/Polysaccharides/Carrageenan

27 **Introduction**

28 Transmission of viruses occurs through 4 routes: direct contact, via physical contact with a  
29 carrier; indirect contact, interactions with contaminated objects; droplet and airborne  
30 transmission, often through coughs, sneezes and breathing; and, aerosolization, atomised  
31 virus suspended in airflow.<sup>[1]</sup> Airborne transmission of respiratory pathogens, whether  
32 through droplets or atomisation, is particularly deleterious, with the virus effectively and  
33 locally delivered to the respiratory pathways. Recent work, primarily undertaken within the  
34 COVID-19 pandemic has heavily focused on providing a deeper understanding on person to  
35 person airborne transmission.<sup>[2-5]</sup> During the act of coughing, turbulent air forces mucus  
36 breakup into droplets<sup>[6]</sup> (*ca.* 0.62 to 15.9  $\mu\text{m}$ ),<sup>[7]</sup> which are then expelled through the oronasal  
37 passages at flow rates of up to 12  $\text{Ls}^{-1}$ , reaching velocities of up to 30  $\text{ms}^{-1}$ .<sup>[8]</sup> Unfortunately,  
38 the expelled cloud is subject to many varying parameters: speed of expulsion, droplet size  
39 and environmental effects such as air speed, resulting in effected boundaries ranging from *ca.*  
40 0.5 to 8 m.<sup>[8,9]</sup> It is likely, for this reason, that the inability to standardise transmission in this  
41 way has led to an ongoing lack of change in regard to the concepts employed to cope with  
42 such issues;<sup>[10]</sup> with recommended distancing guidelines still based on the ideas portrayed by  
43 Chaplin and Wells close to a century ago.<sup>[11,12]</sup> Although the epidemiology of the severe acute  
44 respiratory syndrome coronavirus 2 (SARS-CoV-2) is not yet definitive, clear indications  
45 suggest epidemiological characteristics closely linked to airborne transmittance<sup>[13]</sup>.

46

47 There are many airborne viruses including: influenza-, rhino-, adeno-, entero- and corona-  
48 virus. The latter, *coronaviridae* (CoVs) family, are implicated in a variety of gastrointestinal,

49 central nervous system and respiratory diseases (MERS, SARS);<sup>[14]</sup> with the latest strain,  
50 SARS-CoV-2, receiving much attention due to its devastating impact within the 2020  
51 pandemic. SARS-CoV-2, like all coronaviruses, contains large positive-strand RNA genomes  
52 packed within a helical capsid, all housed within a phospholipid bilayer envelope formed on  
53 budding.<sup>[15,16]</sup> Associated with the viral membrane are 3 main proteins: membrane and  
54 envelope proteins, associated with assembly, and spike proteins. The spike proteins, which  
55 give rise to its corona shape, are essential for virus survival, mediating entry to the host  
56 cell.<sup>[17,18]</sup> Additionally, the protein also plays a crucial role in determining host range and  
57 tissue tropism, alongside being responsible for inducing many of the host immune  
58 responses.<sup>[14]</sup> To date, facilitation of viral entry into a host cell is believed to arise through  
59 specific motifs within the spike protein, which strongly interact with Angiotensin-Converting  
60 Enzyme 2 (ACE2) receptors.<sup>[19,20]</sup> ACE2 is known for its role in regulating oxygen/carbon  
61 dioxide transfer, commonly found within the respiratory epithelia. In particular SARS-CoV-2  
62 has been found to target the ciliated and goblet cells,<sup>[21]</sup> where subsequent viral shedding  
63 results in extensive viral loads, especially within the upper respiratory tract.<sup>[22]</sup>

64

65 Inspired air is primarily routed through the nose. Even though the nasal passages present the  
66 highest resistance to airflow, on average *ca.* 10,000 L of air is inhaled by a healthy human per  
67 day.<sup>[23,24]</sup> Only once this pathway becomes overloaded does the body switch to respiratory  
68 through the mouth.<sup>[25][26]</sup> For this reason, the nasal cavity supports two major roles: climate  
69 control, creating the correct levels of humidity and air temperature; and, removal of foreign  
70 particles including dust, airborne droplets and pathogens.<sup>[27]</sup> Anatomically, the nose consists  
71 of 2 cavities roughly 10 cm in length and half again in height, producing a total surface area  
72 of about 150 cm<sup>2</sup>.<sup>[28]</sup> Inspired air flows up through the nasal vestibule (nostril) and passes  
73 through the slit-like meatus structures (inferior, middle and superior) and back through the

74 nasopharynx. At a cellular level the majority of the cavity consists of a typical airway  
75 epithelium, comprising of 4 main cell types: basal, ciliated/non-ciliated columnar and goblet  
76 cells. The columnar cells, whether ciliated or not, are coated by microvilli. Their role, to  
77 prevent drying, supports the cilia in performing mucociliary clearance of mucins produced in  
78 the goblet cells.<sup>[29,30]</sup> Additionally, the presence of cilia and microvilli drastically increases the  
79 effective surface area (*ca.* 9.6 m<sup>2</sup>), providing a highly efficient platform for filtration.<sup>[31]</sup>  
80 Unfortunately, such large surface areas also provides greater exposure in terms of viral entry.  
81  
82 The airborne risk imposed not only through ventilation systems and crowds, but re-  
83 suspension of the virus from inanimate objects, including personal protective equipment,<sup>[32]</sup>  
84 vociferates the need for new and novel devices that not only prevent contraction, but stop  
85 spread thereafter. This study looks to address such issues, by specifically engineering spray  
86 formulations which target the nasal passages. The emphasis on speed within such  
87 unprecedented times in terms of translating the fundamental science from lab to clinic, drives  
88 key considerations such as simplicity and proven biocompatibility. As such, colloidal  
89 composites of FDA approved polymers were studied for their application as nasal sprays.  
90 Systems were deconstructed back to their single constituents, and characterised for their  
91 mechanical, spray and antiviral properties. As such a set of design principles was determined  
92 in order to present a potential nasal spray to combat airborne pathogens, in particular SARS-  
93 CoV-2.

## 94 **Results**

### 95 *Physico-mechanical behaviours of the nasal spray formulation*

96 On application, nasal sprays directly contact the nasal mucosa lining the epithelium (Fig. 1a).  
97 Longevity of the applicant can be improved via careful choice of the polymer, promoting

98 interaction with the mucus; known as mucoadhesion. A range of polymers known for their  
99 mucoadhesive properties (gellan, carrageenan, alginate, pectin, dextran) were screened  
100 through spray application to a 45° acetate surface (Fig. 1b). Polymers were classed for their  
101 ability to create an even coverage whilst being retained at the sprayed site. Fig. 1bii and 1biii  
102 shows typical images for several of the polymers tested, demonstrating a “good” and “poor”  
103 candidate; gellan and alginate respectively. Screening in this manner provided a means to  
104 narrow the systems down to both gellan and carrageenan going forward, with others either  
105 creating heterogeneous distributions or flowing under their own mass.

106

107 Flow behaviours were characterised via dynamic viscosity (from high to low shear stress),  
108 representative of the material once sprayed. Resultant profiles for the gellan were modelled  
109 demonstrating a transition from power law to Cross model, suggesting the loss of a dynamic  
110 yield stress to zero-shear viscosity as a function of the polymer concentration (Fig. 1ci). No  
111 transition was observed for the  $\lambda$ carrageenan systems, characterised solely by the Cross  
112 model at all polymer concentrations studied (Fig. 1cii). Zero-shear viscosity was dependent  
113 on polymer content, providing viscosities within the range of 0.27 to 0.01 mPa.s for 1.0 to  
114 0.2% (w/v), respectively.

115

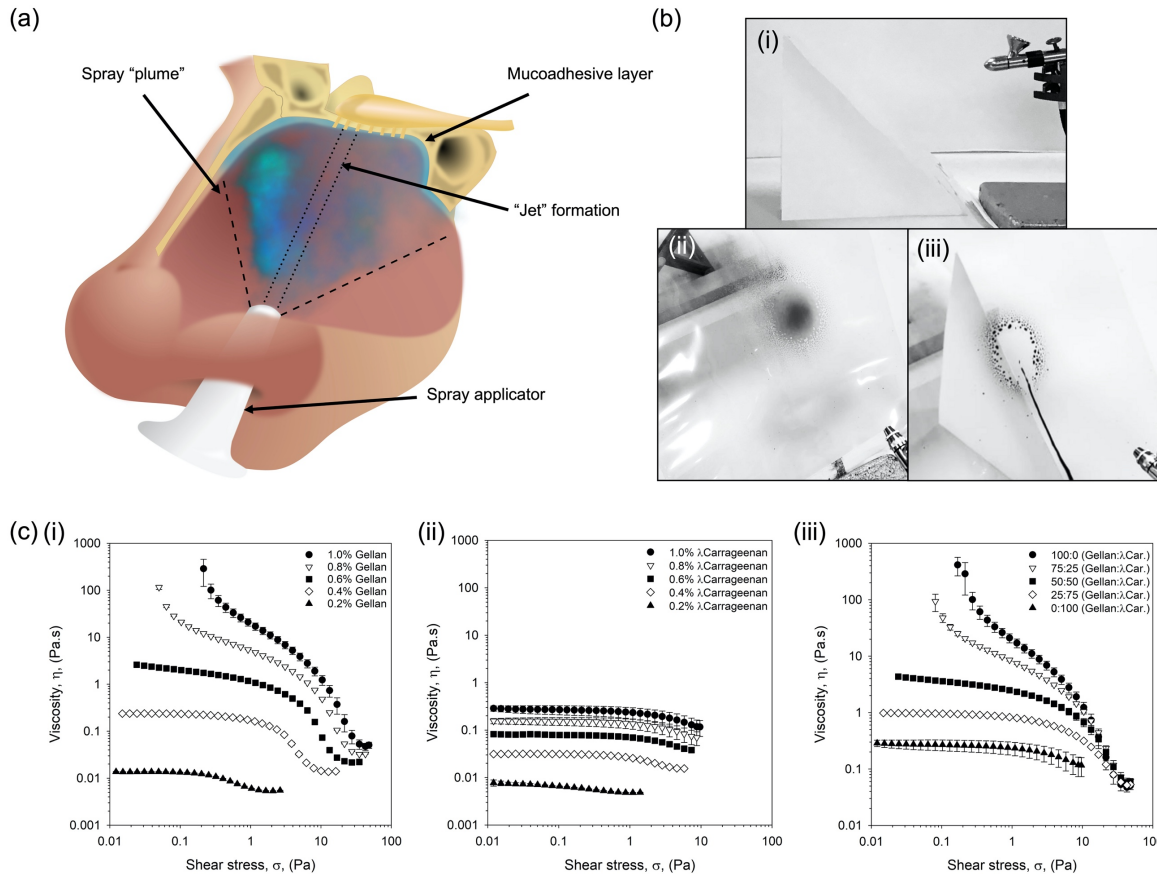

116

117 *Figure 1: Defined nasal spray behaviours.* (a) Schematic diagram demonstrating the application of a nasal spray to the  
 118 nasal cavity. (b) Typical images obtained during screening of numerous mucoadhesive polymers for their ability to evenly  
 119 spray and be retained on a 45° incline: (i) spray set up, (ii) gellan gum 1% (w/v) with black dye, and (iii) alginate 1% (w/v)  
 120 with black dye. (c) Dynamic viscosity profiles from high to low shear stress for: (i) gellan samples with concentrations  
 121 ranging from 0.2 to 1.0% (w/v), (ii)  $\lambda$ carrageenan samples with concentrations ranging from 0.2 to 1.0% (w/v), and (iii)  
 122 composite systems of gellan: $\lambda$ carrageenan at a total polymer concentration of 1% (w/v).

123

124 Viscosity curves for the composite mixtures containing both the gellan and the  $\lambda$ carrageenan  
 125 (ratios of 100:0, 75:25, 50:50, 25:75 and 0:100) have been shown in Fig. 1ciii and Table 1.  
 126 Flow behaviours for the 1% (w/v) systems showed a clear transition from material  
 127 characteristics indicative of the gellan (viscosity asymptoting at low stresses), to those of the  
 128  $\lambda$ carrageenan (plateaued viscosities at low stresses), as the ratio of the two polymers shifted  
 129 from one extreme to the other (gellan to  $\lambda$ carrageenan). Loss of overall viscosity was also  
 130 observed as the systems shifted from high to low gellan ratios, confirmed by the reduction in  
 131 consistency coefficient (K) from 3.54 to 0.03. This correlated well with the increase in rate

132 index (n), where more gellan resulted in higher degrees of shear thinning: 0.40 to 0.82 for  
 133 100% gellan and 100%  $\lambda$ carrageenan, respectively. A reduction in the total polymer content  
 134 to 0.4% (w/v) resulted in all mixtures characterised by the Cross model, consistent with data  
 135 provided for the isolated polymers. Further reduction in the polymer concentration, to 0.2%  
 136 (w/v), resulted in profiles independent on the ratio of gellan to  $\lambda$ carrageenan, with samples  
 137 indistinguishable from each other (within error).

138 *Table 1: Comparison of viscometry data. Tabulated viscometry data compiled for composite systems modelled either using*  
 139 *the power law model (no zero-shear data provided) or Cross model (zero-shear data).*

| Total Polymer<br>(% (w/v)) | Polymer Ratio<br>(Gellan: $\lambda$ Car.) | Zero-Shear Viscosity<br>(Pa.s) | Consistency<br>Coefficient (K) | Rate Index<br>(n) |
|----------------------------|-------------------------------------------|--------------------------------|--------------------------------|-------------------|
| <b>1.0</b>                 | 100:0                                     | N/a                            | 3.544 $\pm$ 0.319              | 0.403 $\pm$ 0.004 |
|                            | 75:25                                     | N/a                            | 2.693 $\pm$ 0.075              | 0.491 $\pm$ 0.002 |
|                            | 50:50                                     | 4.080 $\pm$ 0.324              | 1.163 $\pm$ 0.034              | 0.543 $\pm$ 0.005 |
|                            | 25:75                                     | 0.988 $\pm$ 0.013              | 0.094 $\pm$ 0.002              | 0.727 $\pm$ 0.012 |
|                            | 0:100                                     | 0.274 $\pm$ 0.046              | 0.030 $\pm$ 0.009              | 0.821 $\pm$ 0.151 |
| <b>0.4</b>                 | 100:0                                     | 0.245 $\pm$ 0.002              | 0.065 $\pm$ 0.004              | 0.831 $\pm$ 0.003 |
|                            | 75:25                                     | 0.172 $\pm$ 0.005              | 0.060 $\pm$ 0.001              | 0.692 $\pm$ 0.054 |
|                            | 50:50                                     | 0.083 $\pm$ 0.000              | 0.020 $\pm$ 0.002              | 1.021 $\pm$ 0.084 |
|                            | 25:75                                     | 0.052 $\pm$ 0.002              | 0.016 $\pm$ 0.000              | 1.134 $\pm$ 0.029 |
|                            | 0:100                                     | 0.032 $\pm$ 0.001              | 0.013 $\pm$ 0.001              | 1.293 $\pm$ 0.051 |
| <b>0.2</b>                 | 100:0                                     | 0.014 $\pm$ 0.000              | 0.021 $\pm$ 0.000              | 1.315 $\pm$ 0.161 |
|                            | 75:25                                     | 0.009 $\pm$ 0.000              | 0.022 $\pm$ 0.000              | 1.413 $\pm$ 0.025 |
|                            | 50:50                                     | 0.010 $\pm$ 0.000              | 0.017 $\pm$ 0.003              | 1.341 $\pm$ 0.287 |
|                            | 25:75                                     | 0.007 $\pm$ 0.000              | 0.016 $\pm$ 0.007              | 1.283 $\pm$ 0.403 |
|                            | 0:100                                     | 0.007 $\pm$ 0.000              | 0.026 $\pm$ 0.001              | 1.288 $\pm$ 0.056 |

140

141 Viscometry data was used to better understand the potential residence of the spray within the  
 142 nasal cavity. As such, Eq. 1 was used to predict the stress exerted on the material under  
 143 gravity residing on an incline.

144

145 
$$\sigma_{max} = \rho \cdot g \cdot h \cdot (\sin \theta) \quad [1]$$

146

147 Where  $\rho$  is the density of the nasal spray ( $\text{kg}\cdot\text{m}^{-3}$ ),  $g$  is the force due to gravity ( $9.807 \text{ m}\cdot\text{s}^{-2}$ ),  $h$   
148 is the thickness of the sprayed layer (m) and  $\theta$  is the inclined angle. Applying values for the  
149 polymer suspensions based on a maximum 500  $\mu\text{m}$  thick sprayed layer at  $45^\circ$  (Eq. 2) resulted  
150 in a theoretical stress of 7 mPa.

151

$$152 \quad \sigma_{max} = 1.01 \times 9.807 \times 1 \times 10^{-3} (\sin 45) \quad [2]$$

153

154 A simple force balance revealed insufficient stress under gravity to induce flow in any of the  
155 systems containing a dynamic yield stress. Indeed, even in systems described by the Cross  
156 model, the external stress due to gravity was not sufficient to move the system from its zero-  
157 shear plateau into the thinning region.

### 158 *Understanding formulation spray-ability*

159 Application of the polymeric materials through a typical hand spray aperture has been shown  
160 in Fig. 2. Spray distributions for the single polymer systems have been demonstrated in Fig.  
161 2a. Gellan demonstrated an inherent ability to spray forming a typical “plume” across all  
162 concentrations studied. In contrast, even at the lowest concentration,  $\lambda$ carrageenan systems  
163 demonstrated a degree of “jetting”, becoming more visible as the polymer concentration  
164 increased. Aspirate formation on leaving the nozzle was reflected in the distributions formed  
165 on contact with the substrate (Fig. 2b). Here, following increasing polymer, distributions  
166 became narrower with fewer satellite droplets forming around the central accumulation. A  
167 general negative correlation between %coverage and total polymer concentration was drawn,  
168 loosely fitting a linear trend ( $R^2 = 0.72$  and  $0.62$  for both gellan and  $\lambda$ carrageenan,  
169 respectively) (Fig. 2ci). Furthermore, it was observed that all gellan concentrations resulted in



170 higher coverage than the  $\lambda$ carrageenan, demonstrating maximum and minimum %coverage  
 171 of 28.5-20.7% when compared to 15.9-6.1% for the  $\lambda$ carrageenan systems (0.2 and 1.0%  
 172 (w/v) polymer, respectively).

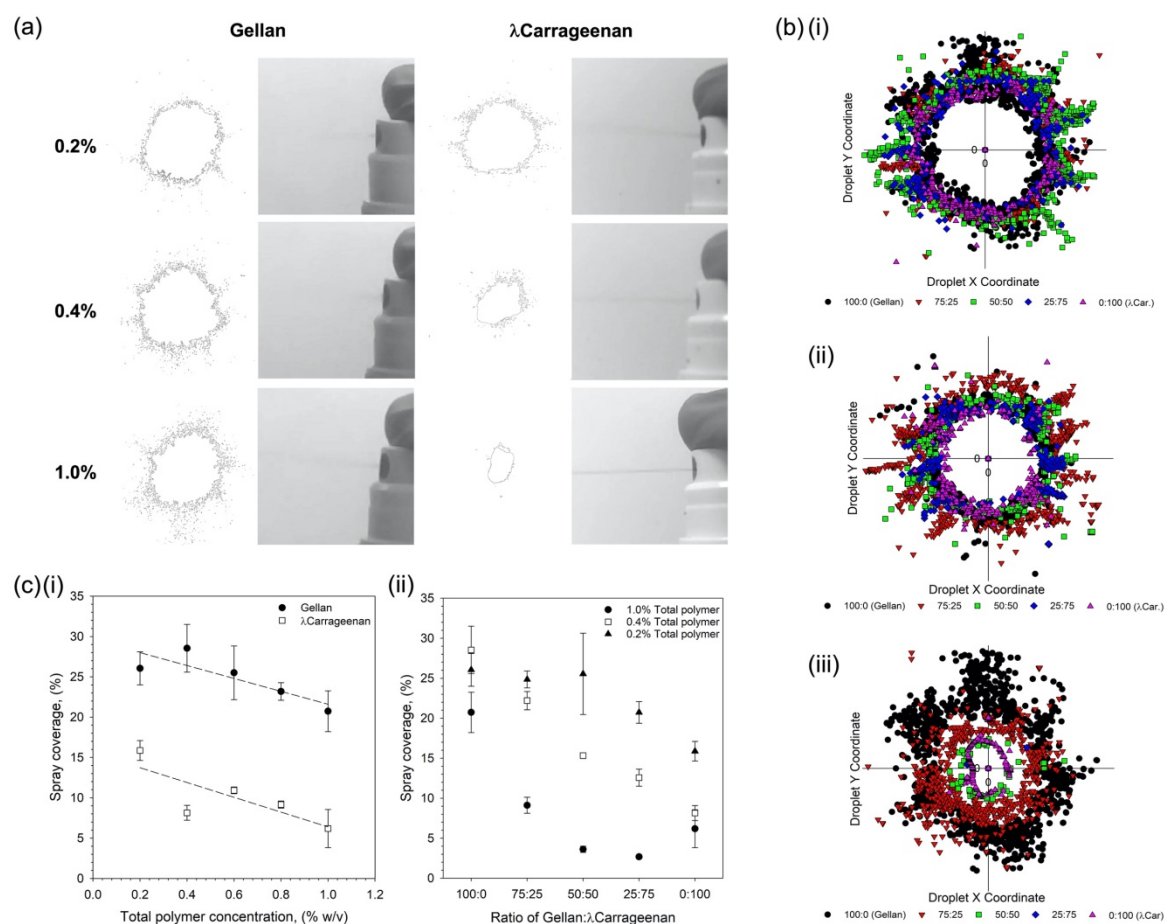

173  
 174 **Figure 2: Spray-ability of polymer suspensions.** (a) typical images of the spray formation as the polymer suspensions are  
 175 aspirated from the applicator, alongside resulting distribution outlines for a range of polymer concentrations. (b) overlay of  
 176 droplet distributions from a central point showing the reduction in spray as a function of the ratio of gellan to  $\lambda$ carrageenan  
 177 for: (i) 0.2% (w/v) total polymer, (ii) 0.4% (w/v) total polymer, and (iii) 1% (w/v) total polymer. (c) spray coverage as  
 178 determined using an imaging software for: (i) single polymer suspensions (trend lines are denoted by the dashed line with  
 179 R2 values of 0.72 and 0.62 for the gellan and  $\lambda$ carrageenan, respectively), and (ii) composite mixtures of the gellan and  
 180  $\lambda$ carrageenan at either 0.2, 0.4 or 1.0% (w/v) total polymer.

181 The role that total and ratio of polymer play within the spray-ability of the composite systems  
 182 can be clearly seen in Fig. 2b. In all instances, irrespective of total polymer concentration, a  
 183 shift to smaller distributions was observed as the ratio of gellan to  $\lambda$ carrageenan decreased.  
 184 Such changes became more pronounced with total polymer, where the magnitude of change

185 between 100% gellan to 100%  $\lambda$ carrageenan, followed 1.0% > 0.4% > 0.2% (w/v). such  
186 observations were mirrored in the total coverage data (Fig. 2cii). Replacing 25% of the total  
187  $\lambda$ carrageenan with gellan resulted in a 4.9% and 4.4% increase in coverage, for the 0.2% and  
188 0.4% (w/v) systems; with an initial loss in spray coverage (-3.5%) for the 1% total polymer  
189 content. Coverage was further increased to 9.0%, 14.1% and 2.9% for the 0.2, 0.4 and 1.0%  
190 (w/v) systems respectively at a ratio of 75:25 (gellan: $\lambda$ carrageenan).

### 191 *In vitro analysis of the nasal spray formulations*

192 First hit and transmission of the virus was studied *in vitro* using SARS-CoV-2 infection of  
193 Vero cells. An initial study was undertaken to determine cell compliance with the sprays over  
194 a 48 hrs incubation period (Fig. 3ai). Cell tolerance was dependent on the polymer  
195 concentration, demonstrating a 2-fold reduction in the number of living cells for both the  
196 gellan and the  $\lambda$ carrageenan at a dilution of 1/2. Dose-response of cell viability was linear ( $R^2$   
197 = 0.96 and 0.97 for gellan and  $\lambda$ carrageenan, respectively), with reduced cell death as the  
198 systems became increasing more dilute.

199

200 Prevention of both contraction and/or transmission of the virus was assessed by two treatment  
201 regimens: treating the virus with the compound prior to infecting the cells (referred to as  
202 virus treated); or, by first treating the cells before introduction of the virus (referred to as cells  
203 treated). Fig. 3aii and aiii show the effect of the single polymer systems on resultant infection  
204 when treated with the virus- and cell-first regimens, respectively. It was observed that in the  
205 case of the gellan only, all dilutions resulted in infection irrespective of treatment regime  
206 after 24 hrs. Indeed after 48 hrs, such observations were exacerbated with dilutions greater  
207 than 1/3 resulting in levels of infection above the control. Interestingly, the  $\lambda$ carrageenan

208 treated systems showed no signs of infection above the uninfected control at either time  
 209 point, 24 or 48 hrs, irrespective of the treatment regimen.

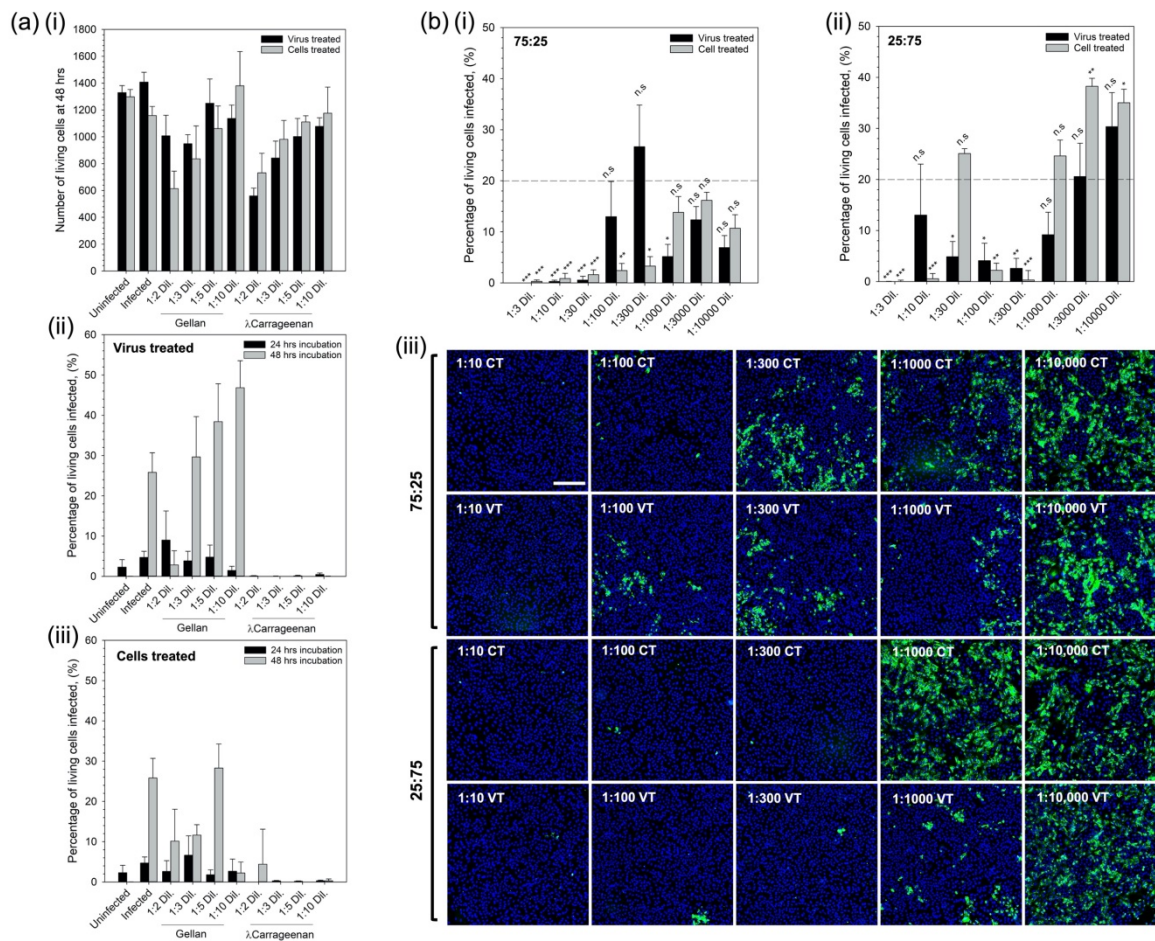

210

211 *Figure 3: First hit and transmission analysis prevention. In vitro SARS-CoV-2 assay using vero cells to determine (a)(i)*  
 212 *cell tolerance to the nasal sprays (live/dead analysis), (ii) degree of infection at 24 and 48 hrs for cells inoculated with the*  
 213 *virus having undergone a pre-treatment with either the gellan or λcarrageenan spray, and (iii) degree of infection at 24 and*  
 214 *48 hrs for spray-treated cells inoculated with the virus. (b) degree of infection for the composite mixtures (1% (w/v) total*  
 215 *polymer) after 48 hrs incubation having undergone either the virus treated or cell treated regimens for, (i) 75:25% gellan to*  
 216 *λcarrageenan, or (ii) 25:75% gellan to λcarrageenan, systems, and (iii) typical fluorescent micrographs of treated systems*  
 217 *using Hoechst staining, scale bar shows 200 μm (blue denotes non-infected and green infected cells). (n.s – not statistically*  
 218 *different, \* - p<0.05, \*\* - p<0.01, and \*\*\* - p<0.001)*

219 Composite systems containing 1% total polymer at either a ratio of 75:25 or 25:75 (gellan to  
 220 λcarrageenan) were also studied using the same virus treatment regimens over 48 hrs; data  
 221 presented in Fig. 3b. Composites of a ratio 75:25 showed significant suppression of the  
 222 infection (minimum of p<0.05) up to a dilution of 1/1000 on comparison with the untreated  
 223 control group (Fig. 3bi). In contrast, composites at a ratio of 25:75 comprising a higher

224 proportion of  $\lambda$ carrageenan, demonstrated fluctuations in suppression with dilutions of 1/30,  
225 1/1000, 1/3000 and 1/10000 all resulting in infection levels equal to or greater than the  
226 untreated control (Fig. 3bii). Comparison of the treatment regimens highlighted key  
227 differences in the ability to suppress infection. Again, for the 25:75 composite it can be seen  
228 that at lower dilution factors, between 1/3 and 1/300 (with the exception of 1/30), resulted in  
229 lower average responses for cells treated prior to infection when compared to treating the  
230 virus first. However, at larger dilution factors ( $>1/300$ ) it became apparent that treatment of  
231 the virus first becomes more effective. This can be seen more clearly in the images showing  
232 Hoechst stained cells, where the extent of infected cells (green – spike 2 protein staining) was  
233 much less for the virus treated groups when compared to the cell treated groups.

#### 234 *Spray mechanism of inhibition*

235 Polymer chemistry was studied in relation to the polymer type and degree of sulphation in  
236 order to better understand the mechanism of infection inhibition. Initial experiments were  
237 conducted to ascertain adherence of the polymer to the cell membrane. Staining (Alcian blue)  
238 of the sugar chains was conducted post treatment and washing. Fig. 4b shows staining  
239 intensity as a function of: polymer type, gellan and carrageenan; and, degree of sulphation  
240 along the carrageenan backbone,  $\iota$  and  $\lambda$ . Intensity data highlighted a significant difference  
241 ( $p<0.001$ ) between cells treated with a 1/3 dilution of both carrageenans when compared to  
242 the cells only group. Moreover, when compared to the stained cells only group, significance  
243 remained ( $p<0.01$ ). Inter-carrageenan analysis demonstrated  $\iota$ carrageenan to have a higher  
244 average intensity in comparison to the  $\lambda$ carrageenan (56.2% and 44.4%, respectively). To  
245 determine whether the degree of sulphation across the polymer backbone was important in  
246 suppression of the infection,  $\kappa$ -,  $\iota$ - and  $\lambda$ -carrageenan were studied using the SARS-CoV-2  
247 assay (Fig. 4c). It was observed that in all cases, where the cells were treated prior to being

248 exposed to the virus, infection was lowered to below the untreated control group ( $p < 0.001$ ).  
 249 This could not be said for the pre-treated virus, where larger dilution factors (1/1000 and  
 250 1/3000) did not statistically affect the degree of infection for both the  $\iota$ - and  $\lambda$ -carrageenans.  
 251 Additionally, no correlation could be drawn to the extent of sulphation and its ability to  
 252 suppress infection.  
 253

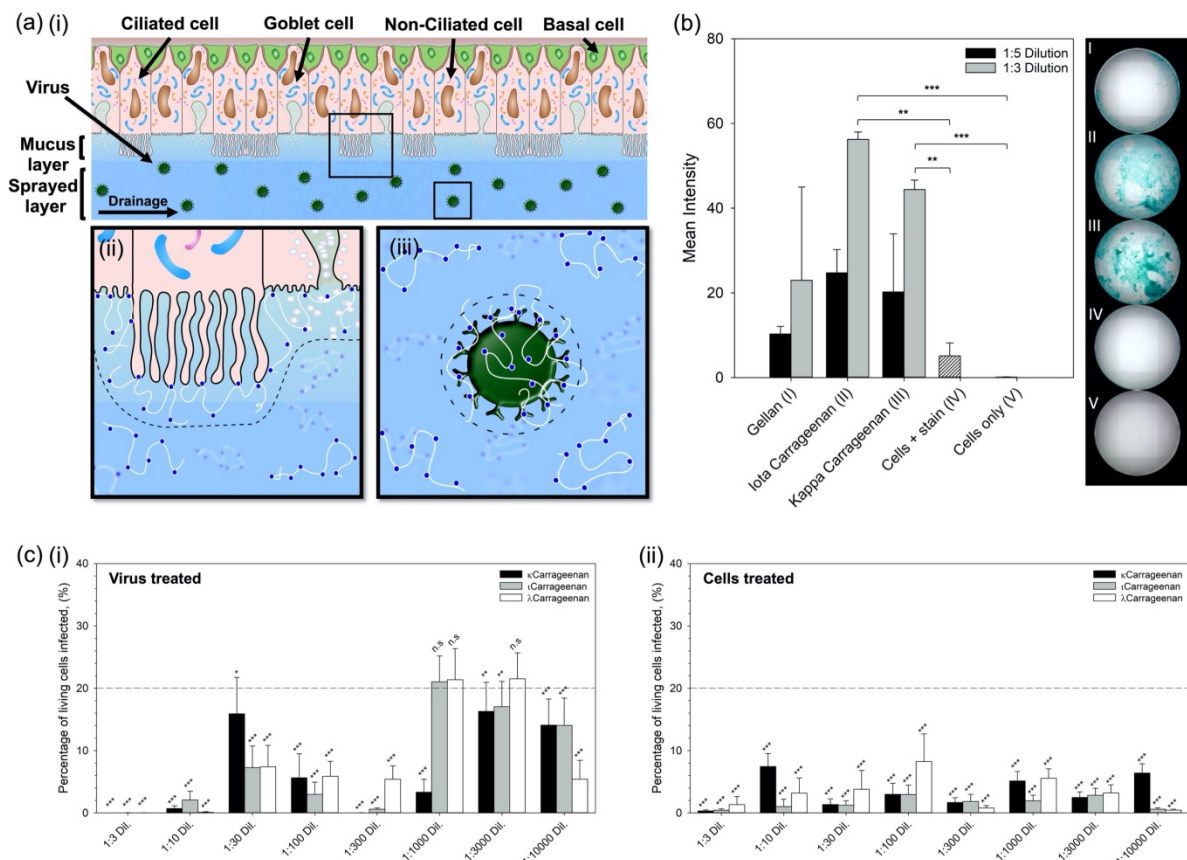

254

255 **Figure 4: Mechanism for the inhibition of SARS-CoV-2.** (a) schematic diagram showing the nasal epithelium covered in  
 256 the nasal spray: (i) demonstrates potential removal of the virus via trapping within the sprayed layer and elimination  
 257 through native pathways, (ii) demonstrates potential blockage of virus uptake into the cells as the polymer creates a steric  
 258 barrier across the cell interface, and (iii) demonstrates potential inhibition of virus uptake by creating a steric barrier  
 259 around the interface of the virus. (b) Alcian blue stain intensity for cells treated and subsequently washed with either gellan,  
 260  $\iota$ carrageenan or  $\lambda$ carrageenan. (c) In vitro SARS-CoV-2 assay using vero cells to determine levels of infection after 48 hrs  
 261 for systems treated with increasingly sulphated carrageenans ( $\kappa < \iota < \lambda$ ), by either: (i) pre-treating the virus, or (ii) pre-  
 262 treating the cells. (n.s – not statistically different, \* -  $p < 0.05$ , \*\* -  $p < 0.01$ , and \*\*\* -  $p < 0.001$ )

263 **Discussion**

264 The role that the nasal passage plays in frontline defence, filtering harmful bacteria and  
265 viruses, naturally elevates the sinonasal pathways to high risk, in terms of infection<sup>[33]</sup>. The  
266 need to formulate medicines/devices which can help regulate and protect this area are thus  
267 clear, however, like many regions of the body the nasal cavity poses many challenges, due to:  
268 ease of access, dynamics (native clearing mechanism) and topology (inclined surfaces or  
269 ceilings). As such, formulation engineering plays a decisive role in the design of novel  
270 therapeutics.<sup>[34]</sup> The link between microstructure and material properties has long been  
271 known, ultimately driving macroscopic responses key to both function  
272 (delivery/retention/ADME – absorption, distribution, metabolism and elimination) and the  
273 end user (ability to administer/patient compliance). Through a microstructural design  
274 approach, the interplay between areas such as raw materials and processing can be  
275 manipulated to engineer defined characteristics. In the case of a nasal spray elements such as  
276 mucoadhesion, longevity, coverage and controlled delivery/prophylaxis need to be  
277 considered. Polysaccharides provide perfect polymeric candidates within biological  
278 applications, as the natural polymers often demonstrate biocompatibility and hold FDA  
279 approval; significantly reducing risk, time and costs throughout the translational process.

280

281 A simple screening process to determine the ability to evenly spray across an inclined  
282 substrate narrowed potential candidates down to both gellan gum (low acyl) and carrageenan  
283 ( $\lambda$ ). In addition to biocompatibility, their long chains (often 100s kDa) and charged side  
284 groups ( $-\text{COO}^-$ ,  $-\text{SO}_3^-$ ) provide inherently strong mucoadhesion through polymer  
285 entanglement, ionic interactions and weaker van der Waals interactions with the mucus  
286 layer.<sup>[35,36]</sup> Such interactions with the mucosa provide high retention to the surface and a

287 mechanism of clearance, becoming transported by the cilia out of the paranasal sinuses to the  
288 pharynx and eventually into the oesophagus.<sup>[29,30]</sup>

289

290 Enhancing longevity within the nasal cavity can also be sought enhanced viscosity and  
291 resultant reduction in flow/clearance. The role that gellan and carrageenan play within  
292 viscosity modification and related sensory attributes has been well established within the  
293 food industry.<sup>[37]</sup> Again, owing to their long polymeric chains and chemistries along their  
294 backbone both gellan and  $\lambda$ carrageenan are able to structure large volumes of water. This,  
295 accompanying polymer-polymer entanglements, ultimately drives increases in viscosity,<sup>[38,39]</sup>  
296 with higher polymer concentrations resulting in more viscous suspensions: until sufficiently  
297 concentrated in the case of the gellan ( $>0.8\%$  (w/v)), providing the evolution of a dynamic  
298 yield stress. Again, yielding behaviour can be used to enhance application and slow  
299 clearance, as the gravitational stress is insufficient to cause rupture of the film formed post-  
300 spraying; where the film height can be estimated as a function of a typical nasal dosage (25 –  
301 200  $\mu$ l)<sup>[40]</sup> over a surface area *ca.* 5 cm<sup>2</sup>.<sup>[31]</sup>

302

303 The large surface areas in the nasal cavity provides the ability to process large volumes of air  
304 (up to 35 Lmin<sup>-1</sup> before switching to oronasal breathing), within a total volume of *ca.* 15  
305 ml.<sup>[31,40]</sup> However, the large nasal area presents a challenge to uniformly coat. Coverage of the  
306 polymer systems demonstrated clear correlations between both the type of polymer and the  
307 concentration of polymer used. Gellan systems demonstrated high levels of coverage across  
308 all concentrations studied, suggesting an ideal candidate for nasal spray application.  
309 Interestingly,  $\lambda$ carrageenan even though characterised by a lower viscosity, resulted in poor  
310 overall coverage whilst still maintaining concentration dependency. Such changes were a  
311 direct result of a shift from plume to jet formation, with gellan resulting in much faster rates

312 of jet destabilisation in comparison to the  $\lambda$ carrageenan. Spray behaviours comply with  
313 literature, suggesting that large surface tensions as opposed to viscosity are required to force  
314 droplet breakup, relative to the density of the surrounding medium.<sup>[41]</sup> As a result, the  
315 persistence of a jet negatively effects patient compliance, not only providing poor coverage,  
316 but eliciting unwarranted irritation on contact with the nasal wall.<sup>[42,43]</sup>

317

318 To maintain the advantage of  $\lambda$ carrageenan's intrinsic anti-viral capacity<sup>[44-46]</sup>, formulation of  
319 a composite mixture containing increasing amounts of gellan to  $\lambda$ carrageenan allowed for  
320 optimisation of the nasal therapy. Careful control over the two polymers provided a means to  
321 engineer enhanced  $\lambda$ carrageenan spray-ability. Interchanging 25% of the initial  $\lambda$ carrageenan  
322 with gellan saw an increasing in the total area coated up to *ca.* 35% of its initial coverage.  
323 This was further increased to *ca.* 63% on replacement of 75% of the initial polymer. In  
324 addition to tailorable spray profiles, composite systems demonstrated a means to formulate  
325 sprays containing  $\lambda$ carrageenan with both yielding and augmented viscosities, not possible  
326 with the  $\lambda$ carrageenan alone. Data showed that the formation of intermediate products, from  
327 100%  $\lambda$ carrageenan to 100% gellan, transitioned in behaviour governed primarily by the  
328 dominating polymer. As such, it was possible to detail a set of design principles that can be  
329 used to formulate various sprays, with desired mechanical properties.

330

331 Cytotoxicity and anti-viral activity of the nasal treatments were assessed using a relevant  
332 enveloped virus, SARS-CoV-2, and their current gold-standard model for infection (Vero  
333 cells). Initial cytotoxicity studies revealed a degree of cell death when cultured in the  
334 presence of both the gellan and  $\lambda$ carrageenan. Such reductions in cell numbers here are  
335 thought to be a consequence of osmotic stress, with high concentrations of the sugars  
336 resulting in cell shock.<sup>[47]</sup> The plethora of literature demonstrating the combability and use of



337 such polysaccharides in pharma and biomaterials<sup>[48]</sup> might suggest that such observations are  
338 indeed an artifact of two-dimensional cell culture, as opposed to inherent toxicity.

339

340 First hit and ability to prevent viral transmission was assessed using two main treatment  
341 regimens. Firstly, prophylaxis was assessed through application of the spray onto the cells  
342 prior to infection. Gellan systems showed limited ability to suppression the SARS-CoV-2  
343 virus, whereas,  $\lambda$ carrageenan demonstrated complete inhibition over 48 hrs. Pre-treatment of  
344 the virus, representing the ability to nullify the virus preventing transmission mirrored  
345 prophylaxis data, with complete inhibition; supporting previous acknowledgements that  
346  $\lambda$ carrageenan provides enhanced anti-viral capacities.<sup>[49]</sup> Composites again provided the  
347 ability to accommodate synergistic behaviours from both gellan and  $\lambda$ carrageenan: enhanced  
348 mechanical responses towards spraying and anti-viral activity. Interestingly, systems  
349 containing a greater proportion of gellan outperformed the  $\lambda$ carrageenan dominated system;  
350 an unexpected outcome based on the single polymer data. Indeed, the spray was highly potent  
351 with dose-dependency demonstrating significant prevention/reduction of infection up to 30-  
352 and 300-fold dilutions for the virus and cell treatments, respectively.

353

354 It is suggested that inhibition of the infection results through 3 main mechanisms: formation  
355 of a steric barrier at the cell interface, adsorption of the polymer to the virus, and/or physical  
356 entrapment of the virus in the sprayed layer. It is proposed that polymer adsorption is  
357 facilitated through charge-charge interactions at the cell and virus membrane. Although both  
358 anionic in nature, the contrast in virus inhibition infers that the carrageenan's sulphate  
359 chemistry drives anchoring of the polymer to the substrate surface; likely through the  
360 formation of di-sulphide bridges with cationic membrane polysaccharides and/or proteins.  
361 The polymer thus provides a physical role, expanding the hydrodynamic volume around the

362 cell/virus and preventing close proximity.<sup>[50]</sup> Even though the role that the negatively charged  
363 sulphate groups play in the ability to adsorb to the bio-interface, it is unclear from the data  
364 whether a link between the degree of sulphation and suppression of infection exists.  
365 Although not significant in the role of coating, gellan does demonstrate its applicability when  
366 considering prophylaxis through entrapment and elimination. The ability to engineer high  
367 viscosities and yielding behaviour at this point becomes key, proportionally slowing  
368 diffusivity, as described by the Stokes-Einstein relation.<sup>[51]</sup> To this end, diffusion of the virus  
369 towards the host cells can be hampered within timescales associated with typical nasal  
370 clearance.<sup>[52]</sup> In reality a combination of the 3 proposed mechanisms is likely to occur. To this  
371 end, physical entrapment is suggested to provide a first means of defence, simultaneously  
372 resulting in a secondary defence where cells and virus become coated. Thus, any virus  
373 particles having migrated to the cell interface are already inhibited to uptake. Likewise, the  
374 formation of new viruses as a result of shedding, become incapacitated. This combinatorial  
375 approach, coupled with the highly potent anti-viral capacity of the carrageenan towards  
376 SARS-CoV-2, provides a powerful spray device with the capacity to prevent both contraction  
377 and transmission.

## 378 ***Conclusions***

379 As the primary mode of transmission for airborne viruses is uptake through the respiratory  
380 tract, the nasal passage poses one of the largest risk factors to contraction. Although it is well  
381 known that the nose filters 1000s of litres of air daily, there is little in the way of preventative  
382 measures to ensure protection to infection. This study has demonstrated the formulation of a  
383 potent antiviral nasal spray, with not only prophylactic capacity, but the ability to prevent  
384 viral transmission. Its ability to completely inhibit infection is derived from the chemistry  
385 (sulphated polymer backbone) of the active polymer,  $\lambda$ carrageenan. Spray characteristics

386 were engineered through the production of a composite, where a set of design rules were  
387 understood to allow for manipulation over the material behaviours: spray coverage, viscosity  
388 and yielding behaviour. Furthermore, understanding the role of each polymer in the  
389 composite allowed for a preventative mechanism, using the synergy of both material and  
390 antiviral properties to coat the biological interfaces, prevent viral uptake by host cells, and  
391 eliminate through native clearance pathways. As such, this work presents a potential device  
392 with the capacity to specifically target infection within the nasal cavity.

### 393 ***Materials and methods***

#### 394 *Materials*

395 Sodium alginate (medium viscosity), pectin from citrus peel, dextran (Mw *ca.* 20 kDa),  
396  $\kappa$ carrageenan,  $\iota$ carrageenan,  $\lambda$ carrageenan, PBS, heat inactivated FBS,  
397 Penicillin/streptomycin, Alcian blue (8GX) were all purchased from Sigma Life Science, UK;  
398 Gellan gum (CG-LA) was purchased from CP Kelco; TrypLE Express 1x was purchased  
399 from Fisher Scientific; Black dye (Parker); Type 1 water (Milli-Q, Merck Millipore).

400 **Single-Component systems** – colloidal suspensions were prepared through the addition of  
401 polymer (0.2 to 1.0% (w/v)) to a dilute PBS (5% v) solution. Once added, the systems were  
402 vigorously mixed and left to fully hydrate for 24 hrs. All samples were kept at ambient  
403 temperature (*ca.* 20 °C) until further used.

404 **Multi-Component systems** – composite mixtures were prepared by first weighing out ratios  
405 of polymer (75:25, 50:50, 25:75 – gellan gum (low acyl) to  $\lambda$ carrageenan), and thoroughly  
406 mixing. Powdered mixtures (0.2, 0.4 and 1.0% (w/v) total polymer concentration) were then  
407 added to a dilute PBS (5% v) solution, vigorously mixed and left to fully hydrate for 24 hrs.  
408 All samples were kept at ambient temperature (*ca.* 20 °C) until further used.

#### 409 *Screening*

410 Polymer screening was conducted using an airbrush (750  $\mu$ m aperture) coupled to an oil-free  
411 compressor (Badger, US), set to 1 bar. Test material (0.9 ml) was mixed with black dye (0.1  
412 ml) and sprayed across an acetate sheet set to a 45° incline. The airbrush was then cleaned  
413 using a succession of 70% ethanol and water. Spray distributions were visually analysed for  
414 homogeneity and retention.

#### 415 *Rheology*

416 Viscometric analysis was undertaken on a rotational rheometer (Kinexus Ultra, Netzsch  
417 Geratebau GmbH, DE) fitted with a cone and plate (4°, 40 mm diameter) geometry. Tests  
418 were conducted at 25 °C, under stress control. Dynamic viscosity was analysed by reduction  
419 of the shear stress from a maximum of 100 to 0.001 Pa (dependent on test material to prevent  
420 expulsion from the gap at lower viscosities) over a 2 mins ramp time. Kinexus software was  
421 used to characterise the flow profiles using both power law and Cross models.

422 *Spray-ability*

423 Test material was first mixed with black dye (0.1% v) and thoroughly shaken to provide a  
424 homogenous mixture. A typical handheld applicator (Adelphi, UK) was used to vertically  
425 spray a paper recipient. Sprayed distributions were allowed to dry in air (no blotting effects  
426 observed) and scanned at 600 DPI (greyscale). Image files were processed using an image  
427 package (ImageJ), where they were initially cropped to a 2000 by 2000 px box visually  
428 centred around the spray pattern. Standard thresholding was applied to all images, and scale  
429 corrected equating 2000 px to 100%. Droplet analysis was conducted, and total coverage  
430 determined as a percentage of the whole image. Distributions were recorded as x/y co-  
431 ordinates and plotted relative to the central droplet.

432 *Infection/transmission*

433 Vero cell were washed with PBS, dislodged with 0.25% Trypsin-EDTA (Sigma life sciences)  
434 and seeded into 96-well imaging plates (Greiner) at a density of  $10^4$  cells per well in culture  
435 media (DMEM containing 10% FBS, 1% Penicillin and Streptomycin, 1% L-Glutamine and  
436 1% non-essential amino acids). Cells were incubated for 24 hrs to allow time for adherence.  
437 Virus or cells were treated with polymeric solutions, diluted in media, 1 hr prior to infections.  
438 Cells were subsequently infected with SARS-CoV-2 virus England 2 stock  $10^6$  IUml<sup>-1</sup> (kind  
439 gift from Christine Bruce, Public health England) diluted 1/150 in culture media. Cells were  
440 fixed in ice-cold MeOH after infection. Cells were then washed in PBS and stained with  
441 rabbit anti-SARS-CoV-2 spike protein, subunit 1 (The Native Antigen Company), followed  
442 by Alexa Fluor 555-conjugated goat anti-rabbit IgG secondary antibody (Invitrogen,  
443 ThermoFisher). Cell nuclei were visualised with Hoechst 33342 (ThermoFisher). Cells were  
444 washed with PBS and then imaged and analysed using a ThermoScientific CellInsight CX5  
445 High-Content Screening (HCS) platform. Infected cells were scored by perinuclear

446 fluorescence above a set threshold determined by positive (untreated) and negative  
447 (uninfected) controls.

#### 448 *Cell binding*

449 **Preparation of cells** – Vero cells were expanded in T75 flasks, washed with PBS (5 ml) and  
450 removed using TrypLE (2.5 ml). The cells were then re-suspended in complete media and  
451 seeded in to 96 well plates (10,000 cells per well). Cells were left to attach over the  
452 subsequent 24 hrs prior to treatment.

453 **Cell treatment** - cells were washed (3 times) with PBS and final washing removed. Test  
454 material was diluted to either 1/3 or 1/5 and placed over the cells (200 µl) (controls were  
455 treated with equal volumes of PBS). Cells were incubated for 30 minutes prior to washing (3  
456 times) with PBS. Cells were subsequently stained with Alcian blue (0.1%) for 30 minutes,  
457 before a final wash in PBS to remove residual stain. PBS was then added (200 µl) and wells  
458 imaged.

459 **Cell Imaging** – cells were imaged using a Cytation 5M automated microplate imager. Wells  
460 were images in bright field using a x4 optical lens focused on the centre of each well. Wells  
461 were divided into a 6 x 4 matrix and stitched together retrospectively. Images were then  
462 cropped to the well diameter using a software package (ImageJ) and colour thresholding  
463 standardised and analysed for mean intensity.

#### 464 *Statistics*

465 In all experiments data presented is an average of at least triplicates with error portrayed as  
466 the 95% confidence interval. Significance was determined by first assessing data for  
467 normality. Where normally distributed, paired t-tests were conducted comparing the  
468 treatment group to the untreated control. If the normality test failed, comparison was made on

469 ranks using the Mann-Whitney. Significance has been shown on plots using the following  
470 notation: n.s – not statistically different; \* -  $p < 0.05$ ; \*\* -  $p < 0.01$ ; and, \*\*\* -  $p < 0.001$ .

#### 471 *Acknowledgments*

472 The authors would like to extend thanks to: Stephen Priestnall for useful discussions;  
473 Nicholas Barnes and Vasanthi Vigneswara of the University of Birmingham Clinical  
474 Sciences for help undertaking elements of the cell work; and, Christine Bruce of Public  
475 Health England for kindly providing the SARS-CoV-2 virus.

#### 476 *References*

- 477 [1] R. Dhand, J. Li, *Am. J. Respir. Crit. Care Med.* **2020**, 202, 651.  
478 [2] R. Wathore, A. Gupta, H. Bherwani, N. Labhasetwar, *Sci. Total Environ.* **2020**, 749,  
479 141486.  
480 [3] L. Morawska, J. Cao, *Environ. Int.* **2020**, 139, 105730.  
481 [4] V. Stadnytskyi, C. E. Bax, A. Bax, P. Anfinrud, *Proc. Natl. Acad. Sci. U. S. A.* **2020**,  
482 117, 11875.  
483 [5] S. Kaur, H. Bherwani, S. Gulia, R. Vijay, R. Kumar, *Environ. Dev. Sustain.* **2020**, 1.  
484 [6] F. D. McCool, *Chest* **2006**, 129, 48S.  
485 [7] S. Yang, G. W. M. Lee, C. M. Chen, C. C. Wu, K. P. Yu, *J. Aerosol Med. Depos.*  
486 *Clear. Eff. Lung* **2007**, 20, 484.  
487 [8] L. Bourouiba, *JAMA - J. Am. Med. Assoc.* **2020**, 323, 1837.  
488 [9] T. Dbouk, D. Drikakis, *Phys. Fluids* **2020**, 32, 053310.  
489 [10] E. Y. C. Shiu, N. H. L. Leung, B. J. Cowling, *Curr. Opin. Infect. Dis.* **2019**, 32, 372.  
490 [11] W. F. Wells, *Am. J. Epidemiol.* **1934**, 20, 611.  
491 [12] A. D. Langmuir, *Ann. N. Y. Acad. Sci.* **1980**, 353, 35.  
492 [13] N. Van Doremalen, T. Bushmaker, D. H. Morris, M. G. Holbrook, A. Gamble, B. N.  
493 Williamson, A. Tamin, J. L. Harcourt, N. J. Thornburg, S. I. Gerber, J. O. Lloyd-  
494 Smith, E. De Wit, V. J. Munster, *N. Engl. J. Med.* **2020**, 382, 1564.  
495 [14] F. Li, *Annu. Rev. Virol.* **2016**, 3, 237.  
496 [15] B. G. Hogue, C. E. Machamer, in *Nidoviruses*, ASM Press, Washington, DC, USA,  
497 **2014**, pp. 179–200.  
498 [16] D. Schoeman, B. C. Fielding, *Virol. J.* **2019**, 16, 1.  
499 [17] C. M. Chan, P. C. Y. Woo, S. K. P. Lau, H. Tse, H. L. Chen, F. Li, B. J. Zheng, L.  
500 Chen, J. D. Huang, K. Y. Yuen, *Exp. Biol. Med.* **2008**, 233, 1527.  
501 [18] X. Ou, Y. Liu, X. Lei, P. Li, D. Mi, L. Ren, L. Guo, R. Guo, T. Chen, J. Hu, Z. Xiang,  
502 Z. Mu, X. Chen, J. Chen, K. Hu, Q. Jin, J. Wang, Z. Qian, *Nat. Commun.* **2020**, 11, 1.  
503 [19] J. Shang, G. Ye, K. Shi, Y. Wan, C. Luo, H. Aihara, Q. Geng, A. Auerbach, F. Li,  
504 *Nature* **2020**, 581, 221.  
505 [20] J. T. Ortega, M. L. Serrano, F. H. Pujol, H. R. Rangel, *EXCLI J.* **2020**, 19, 410.  
506 [21] W. Sungnak, N. Huang, C. Bécavin, M. Berg, R. Queen, M. Litvinukova, C. Talavera-

- 507 López, H. Maatz, D. Reichart, F. Sampaziotis, K. B. Worlock, M. Yoshida, J. L.  
508 Barnes, N. E. Banovich, P. Barbry, A. Brazma, J. Collin, T. J. Desai, T. E. Duong, O.  
509 Eickelberg, C. Falk, M. Farzan, I. Glass, R. K. Gupta, M. Haniffa, P. Horvath, N.  
510 Hubner, D. Hung, N. Kaminski, M. Krasnow, J. A. Kropski, M. Kuhnemund, M. Lako,  
511 H. Lee, S. Leroy, S. Linnarson, J. Lundeberg, K. B. Meyer, Z. Miao, A. V. Misharin,  
512 M. C. Nawijn, M. Z. Nikolic, M. Nosedá, J. Ordovas-Montanes, G. Y. Oudit, D. Pe'er,  
513 J. Powell, S. Quake, J. Rajagopal, P. R. Tata, E. L. Rawlins, A. Regev, P. A. Reyfman,  
514 O. Rozenblatt-Rosen, K. Saeb-Parsy, C. Samakovlis, H. B. Schiller, J. L. Schultze, M.  
515 A. Seibold, C. E. Seidman, J. G. Seidman, A. K. Shalek, D. Shepherd, J. Spence, A.  
516 Spira, X. Sun, S. A. Teichmann, F. J. Theis, A. M. Tsankov, L. Vallier, M. van den  
517 Berge, J. Whitsett, R. Xavier, Y. Xu, L. E. Zaragosi, D. Zerti, H. Zhang, K. Zhang, M.  
518 Rojas, F. Figueiredo, *Nat. Med.* **2020**, *26*, 681.
- 519 [22] L. Zou, F. Ruan, M. Huang, L. Liang, H. Huang, Z. Hong, J. Yu, M. Kang, Y. Song, J.  
520 Xia, Q. Guo, T. Song, J. He, H. L. Yen, M. Peiris, J. Wu, *N. Engl. J. Med.* **2020**, *382*,  
521 1177.
- 522 [23] D. F. Proctor, *Elsevier Biomed. Press* **1982**.
- 523 [24] P. Cole, *Curr. Opin. Otolaryngol. Head Neck Surg.* **1994**, *16*.
- 524 [25] P. Camner, B. Bakke, *Environ. Res.* **1980**, *21*, 394.
- 525 [26] D. Elad, M. Wolf, T. Keck, *Respir. Physiol. Neurobiol.* **2008**, *163*, 121.
- 526 [27] D. F. Proctor, *Bacteriol. Rev.* **1966**, *30*, 498.
- 527 [28] N. Mygind, R. Dahl, *Adv. Drug Deliv. Rev.* **1998**, *29*, 3.
- 528 [29] E. Houtmeyers, R. Gosselink, G. Gayan-Ramirez, M. Decramer, *Eur. Respir. J.* **1999**,  
529 *13*, 1177.
- 530 [30] N. A. Cohen, *Ann. Otol. Rhinol. Laryngol.* **2006**, *115*, 196:20.
- 531 [31] S. Gizurarson, *Curr. Drug Deliv.* **2012**, *9*, 566.
- 532 [32] Y. Liu, Z. Ning, Y. Chen, M. Guo, Y. Liu, N. K. Gali, L. Sun, Y. Duan, J. Cai, D.  
533 Westerdahl, X. Liu, K. Xu, K. fai Ho, H. Kan, Q. Fu, K. Lan, *Nature* **2020**, *582*, 557.
- 534 [33] I. Gengler, J. C. Wang, M. M. Speth, A. R. Sedaghat, *Laryngoscope Investig.*  
535 *Otolaryngol.* **2020**, *5*, 354.
- 536 [34] M. E. Cooke, S. W. Jones, B. ter Horst, N. Moiemmen, M. Snow, G. Chouhan, L. J. Hill,  
537 M. Esmali, R. J. A. Moakes, J. Holton, R. Nandra, R. L. Williams, A. M. Smith, L.  
538 M. Grover, *Adv. Mater.* **2018**, DOI 10.1002/adma.201705013.
- 539 [35] S. L. Cook, S. P. Bull, L. Methven, J. K. Parker, V. V. Khutoryanskiy, *Food*  
540 *Hydrocoll.* **2017**, *72*, 281.
- 541 [36] N. A. Peppas, J. J. Sahlin, *Biomaterials* **1996**, *17*, 1553.
- 542 [37] A. M. Stephen, G. O. Phillips, P. A. Williams, Eds. , *Food Polysaccharides and Their*  
543 *Applications: Second Edition*, CRC Press, **2016**.
- 544 [38] S. Jampen, I. J. Britt, M. A. Tung, *Food Res. Int.* **2000**, *33*, 579.
- 545 [39] E. I. Yaseen, T. J. Herald, F. M. Aramouni, S. Alavi, *Food Res. Int.* **2005**, *38*, 111.
- 546 [40] P. G. Djupesland, *Drug Deliv. Transl. Res.* **2013**, *3*, 42.
- 547 [41] S. P. Lin, R. D. Reitz, *Annu. Rev. Fluid Mech.* **1998**, *30*, 85.
- 548 [42] I. Y. Z. Wong, S. E. Soh, S. Y. Chng, L. P.-C. Shek, D. Y. T. Goh, H. P. S. Van Bever,  
549 B. W. Lee, *Pediatr. Allergy Immunol.* **2010**, *21*, 1146.
- 550 [43] J. Liang, A. P. Lane, *Curr. Otorhinolaryngol. Rep.* **2013**, *1*, 51.
- 551 [44] C. B. Buck, C. D. Thompson, J. N. Roberts, M. Müller, D. R. Lowy, J. T. Schiller,  
552 *PLoS Pathog.* **2006**, *2*, 0671.
- 553 [45] A. Grassauer, R. Weinmuellner, C. Meier, A. Pretsch, E. Prieschl-Grassauer, H.  
554 Unger, *Virol. J.* **2008**, *5*, 107.
- 555 [46] Y. H. Chiu, Y. L. Chan, L. W. Tsai, T. L. Li, C. J. Wu, *Antiviral Res.* **2012**, *95*, 128.
- 556 [47] J. K. F. Wong, A. D. Metcalfe, R. K. F. Wong, J. Bush, C. Platt, *PLoS One* **2014**, *9*,



- 557 112672.  
558 [48] L. R. Stevens, K. J. Gilmore, G. G. Wallace, M. In Het Panhuis, *Biomater. Sci.* **2016**,  
559 4, DOI 10.1039/c6bm00322b.  
560 [49] M. Baba, R. Snoeck, R. Pauwels, E. De Clercq, *Antimicrob. Agents Chemother.* **1988**,  
561 32, 1742.  
562 [50] L. B. Talarico, E. B. Damonte, *Virology* **2007**, 363, 473.  
563 [51] A. Einstein, *Ann. Phys.* **1905**, 322, 549.  
564 [52] G. M. Corbo, A. Foresi, P. Bonfitio, A. Mugnano, N. Agabiti, P. J. Colet, H. Defence,  
565 *Arch. Dis. Child.* **1989**, 64, 546.  
566
